# Supplementary material for: Quantitative and Fiber-Selective Evaluation for Central Poststroke Pain
Source: Neural Plast. 2022 Jun 6;2022:1507291. doi: 10.1155/2022/1507291 (PMC9192306; doi:10.1155/2022/1507291)
Supplement: Supplementary Materials — (1) Median CPT parameters of the contralesional side and ipsilesional side in CPSP patients. (2) Pain symptomatology of central poststroke pain. (3) STROBE Checklists. [file 1507291.f1.zip]

Archive with 3 entries (3 files):
- STROBE_checklist_cross-sectional.pdf
- Supplement 1.docx
- Supplement 2.docx
